# Supplementary material for: Identification and Analysis of Genome-Wide SNPs Provide Insight into Signatures of Selection and Domestication in Channel Catfish (Ictalurus punctatus)
Source: PLoS One. 2014 Oct 14;9(10):e109666. doi: 10.1371/journal.pone.0109666 (PMC4196944; doi:10.1371/journal.pone.0109666)
Supplement: Table S1 — Summary of the 23 genomic regions with selective sweeps, including channel catfish scaffold ID, window number, pooled heterozygosity score, scaffold position and the genes located in the regions. (XLSX) [file pone.0109666.s001.xlsx]

## Sheet: Sheet1
Scaffold ID	Window number	Hp score	Log transformed Hp score	Start position of the window	end position of the window	Protein ID	Gene Name
jcf7180003676417	361	0	-	7200000	7220000		HIF-1-beta
jcf7180003676363	184	0.01	-6.38	3660000	3680000	P35072	ABCB5
jcf7180003676363	196	0.04	-4.59	3900000	3920000
jcf7180003676363	205	0.04	-4.62	4080000	4100000
jcf7180003665128	1	0.05	-4.34	1	2916
jcf7180003676359	16	0.05	-4.31	300000	320000
jcf7180003676305	60	0.05	-4.3	1180000	1200000	Q5HZY0,Q6NUV0	Ubxn4,RAB3GAP1
jcf7180003676453	57	0.05	-4.3	1120000	1140000	A4IFA3	GTF2IRD2
jcf7180003675342	1	0.05	-4.21	1	20000
jcf7180003676341	56	0.05	-4.21	1100000	1120000
jcf7180003676323	16	0.06	-4.12	300000	320000
jcf7180003669997	1	0.06	-4.11	1	10862
jcf7180003675277	9	0.06	-4.11	160000	180000	Q9NQE7	PRSS16
jcf7180003676312	109	0.06	-4.07	2160000	2180000	P20794,Q0P436	MAK,TMEM14C
jcf7180003675854	17	0.06	-4.06	320000	340000
jcf7180003676350	31	0.06	-4.05	600000	620000
jcf7180003662989	1	0.06	-4.05	1	5114
jcf7180003676337	177	0.06	-4.03	3520000	3540000	P27546	MAP4
jcf7180003668664	1	0.06	-4.03	1	10256	Q8SPJ1	JUP
jcf7180003676121	31	0.06	-4.03	600000	620000
jcf7180003668055	2	0.06	-4.02	20000	40000
jcf7180003665961	1	0.06	-4.01	1	11463	Q5T3F8	TMEM63B
jcf7180003670939	2	0.06	-4.01	20000	40000
